# 1 **Assessment of COVID-19 vaccine hesitancy among** 2 **Zimbabweans: A rapid national survey**

3

4  
5 Paddington T. Mundagowa<sup>1\*</sup>¶, Samantha N. Tozivepi<sup>1¶</sup>, Edward T. Chiyaka<sup>2</sup>, Fadzai  
6 Mukora-Mutseyekwa<sup>1,6</sup>, Richard Makurumidze<sup>3,4,5,6</sup>

## 7 **Affiliations**

- 8 1. Africa University, College of Health, Agriculture & Natural Science, Clinical  
9 Research Centre
- 10 2. Kent State University, College of Public Health, Ohio, USA
- 11 3. University of Zimbabwe, Faculty of Medicine and Health Sciences, Public and  
12 Global Health Unit, Harare, Zimbabwe
- 13 4. Institute of Tropical Medicine, Clinical Sciences Department, Antwerp, Belgium
- 14 5. Free University of Brussels (VUB), Gerontology, Faculty of Medicine &  
15 Pharmacy, Brussels, Belgium
- 16 6. Zimbabwe College of Public Health Physicians, Harare, Zimbabwe

17

18 **\*Corresponding Author:** Email: [mundagowap@africau.edu](mailto:mundagowap@africau.edu) (PTM)

19 ¶ PTM and SNT contributed equally.

20

21

## 22 Abstract

23 **Background:** To minimise the devastating effects of the coronavirus disease 2019  
24 (COVID-19) pandemic, scientists hastily developed a vaccine. However, the scale-up of  
25 the vaccine is likely to be hindered by the widespread social media misinformation. We,  
26 therefore, conducted a study to assess the COVID-19 vaccine hesitancy among  
27 Zimbabweans.

28 **Methods:** We conducted a descriptive online cross-sectional survey using a self-  
29 administered questionnaire among adults. The questionnaire assessed willingness to be  
30 vaccinated; socio-demographic characteristics, individual attitudes and perceptions,  
31 effectiveness, and safety of the vaccine. Multivariable logistic regression analysis was  
32 utilized to examine the independent factors associated with vaccine uptake.

33 **Results:** We analysed data for 1168 participants, age range of 19-89 years with the  
34 majority being females (57.5%). Half (49.9%) of the participants reported that they  
35 would accept the COVID-19 vaccine. The majority were uncertain about the  
36 effectiveness of the vaccine (76.0%) and its safety (55.0%). About half lacked trust in  
37 the government's ability to ensure the availability of an effective vaccine and 61.0%  
38 mentioned that they would seek advice from a healthcare worker to vaccinate. Age 55  
39 years and above [vs 18-25 years - Adjusted Odds Ratio (AOR): 2.04, 95% Confidence  
40 Interval (CI): 1.07-3.87], chronic disease [vs no chronic disease - AOR: 1.72, 95%CI:  
41 1.32-2.25], males [vs females - AOR: 1.84, 95%CI: 1.44-2.36] and being a healthcare  
42 worker [vs not being a health worker – AOR: 1.73, 95%CI: 1.34-2.24] were associated  
43 with increased likelihood to vaccinate. History of COVID-19 infection [vs no history -

44 AOR: 0.45, 95%CI: 0.25-0.81) and rural residence [vs urban - AOR: 0.64, 95%CI: 0.40-  
45 1.01] were associated with reduced likelihood to vaccinate.

46 **Conclusion:** We found half of the participants willing to vaccinate against COVID-19.  
47 The majority lacked trust in the government and were uncertain about vaccine  
48 effectiveness and safety. The policymakers should consider targeting geographical and  
49 demographic groups which were unlikely to vaccinate with vaccine information,  
50 education, and communication to improve uptake.

51

52 **Keywords:** COVID-19, coronavirus, vaccine, hesitancy, willingness, Zimbabwe

## 53 Introduction

54 Since the first case of the coronavirus disease (COVID-19) caused by the novel severe  
55 acute respiratory syndrome coronavirus 2 (SARS-CoV-2) was reported in 2019, more  
56 than three million fatalities and 1.55 billion cases have been recorded globally (1) The  
57 healthcare systems have been strained and the adverse socio-economic and  
58 psychological impacts are overwhelming (2–4).

59 Fortunately, more than 100 vaccines have gone beyond the pre-clinical development  
60 phase with more than half of these reaching the clinical development phase (5). The  
61 herd immunity for SARS-CoV-19 can be reached by vaccinating about 60-72% of the  
62 population (6), thus, vaccine acceptance rates will play a major role in combating the  
63 pandemic. However, vaccine hesitancy has been recognized as a major threat to the  
64 control of vaccine preventable diseases (7). The recent COVID-19 pandemic has  
65 caused an outbreak of “infodemics” which has led to rapid and far-reaching spread of

66 inaccurate information on the COVID-19 vaccine (8). This deluge of unreliable  
67 information can contribute to COVID-19 vaccine hesitancy despite the availability of  
68 safe and effective vaccines (9).

69 Like many other developing countries, Zimbabwe has started the process of securing  
70 COVID-19 vaccine. A COVID-19 national deployment and vaccination strategy (10) has  
71 been developed and plans for national deployment and training of healthcare workers  
72 are underway. In this barrage of infodemics, Zimbabweans have not been spared as  
73 conspiracy beliefs filtered through the population, particularly through the different social  
74 media platforms. The best way to fight misinformation is through aggressive  
75 dissemination of accurate information about the truths of the risks and benefits of  
76 COVID-19 vaccine.

77 Evidence on the population's intention to be vaccinated for COVID-19 is limited and  
78 public health authorities are confronted with a challenge of objectively discerning the  
79 truth from the circulating information blast. Understanding the factors influencing  
80 vaccine hesitancy is pertinent in crafting targeted communication and interventions to  
81 sell the idea of vaccination to specific groups of people. We therefore conducted a  
82 national survey to assess COVID-19 vaccine hesitancy among Zimbabweans. We  
83 assessed socio-demographic characteristics, individual attitudes and perceptions,  
84 Covid-19 vaccine effectiveness and safety, and risks of contracting the COVID-19 in  
85 relation to the uptake of the COVID-19 vaccine.

## 86 **Methods**

### 87 **Study Design**

88 We conducted an online descriptive cross-sectional survey in February 2021.

### 89 **Study setting**

90 The study was conducted in Zimbabwe. By the end of 2020, the country had an  
91 estimated population of 15.1 million (11). Approximately 99.6% of the population is of  
92 African origin and the median age is 18.7 years (12). Geographically, the country is  
93 divided into 10 provinces and 63 districts. The first COVID-19 case was recorded on the  
94 20<sup>th</sup> of March 2020 and according to the Zimbabwean Ministry of Health and Child Care  
95 Daily COVID-19 Update Report of the 11<sup>th</sup> of May 2021, the country had recorded a  
96 cumulative of 38 466 cases, 36 277 recoveries, and 1579 deaths (13).

### 97 **Study participants**

98 All Zimbabwean residents were eligible to participate in the survey. Considering the  
99 online nature of the survey and the easy sharing via social networks, we allowed  
100 Zimbabweans out of the country to participate but were excluded from the analysis  
101 because (information to inform local context) their COVID-19 vaccine uptake was more  
102 likely to be influenced by their current context. We included adults aged 18 years and  
103 above and those who had participated but below 18 years were excluded. The survey  
104 was disseminated mainly via social media networks (WhatsApp and Facebook) hence  
105 those registered in those platforms were likely to participate.

106

## 107 **Sample size**

108 The minimum sample size was estimated at 423, based on the following assumptions;  
109 95% confidence interval, 5% margin of error, the expected proportion of vaccine uptake  
110 estimated as 52% (14) in the adult population in Zimbabwe and the attrition rate of 10%.

## 111 **Data collection tools and procedures**

112 A multi-item survey questionnaire was developed based on literature review (15,16).  
113 The online questionnaire was designed using Google Forms. The survey questionnaire  
114 was developed in English and later translated into the two main local languages in  
115 Zimbabwe, Shona and Ndebele. The survey questionnaire comprised of five sections  
116 with the first section collecting participant's demographic data (age, sex, residence,  
117 educational level, employment status, medical aid status). The second section  
118 consisted of questions soliciting information and knowledge on COVID-19 vaccine. The  
119 third section sought to assess vaccine uptake, effectiveness and safety. The fourth  
120 section assessed the risk of contracting COVID-19. We also collected qualitative  
121 information through open-ended questions and will be reported separately.

122 Our outcome variable was vaccine uptake in the event that a COVID-19 vaccine  
123 becomes available and it had three responses, "Would Accept", "Unsure" and "Would  
124 reject". However, for our analysis we combined our responses into binary those that will  
125 be vaccinated "Yes" (Would Accept) and those that would not be vaccinated, "No"  
126 (Unsure/Would reject). Potential study participants were recruited using random  
127 sampling via social media mainly WhatsApp and Facebook through the network and

128 contacts of the researchers. The researchers encouraged participants to share the  
129 online survey with others in their networks as well. The survey was also shared in social  
130 media groups for academic and community organizations. Measures were put in place  
131 to ensure that the questionnaire was taken only once. Data were collected over a period  
132 of 15 days from the 3<sup>rd</sup> of February 2021 to the 17<sup>th</sup> of February 2021.

133

## 134 **Statistical Analysis**

135 A database was created in Microsoft Excel using the data extracted from the online  
136 server. Responses from the Shona and Ndebele questionnaires were coded into  
137 English and then merged into one English database. Data cleaning was done in Excel  
138 before exporting it to SPSS for analyses. Statistical analysis was performed using SPSS  
139 (V.26.0). Descriptive statistics were conducted using frequencies and proportions and  
140 were presented in tables and graphs. Logistic regression models were used to examine  
141 factors associated with vaccine uptake. Statistical significance was set at  $p < 0.05$  and  
142 95% confidence interval.

## 143 **Ethical considerations**

144 Ethical clearance to carry out this study was obtained from the Medical Research  
145 Council of Zimbabwe (MRCZ/A/2714). Informed consent was provided online and all  
146 participants were asked to accept or reject participation in the online survey.  
147 Participation in this study was voluntary and was not incentivized. All the responses  
148 provided during this survey were anonymous.

## 149 **Results**

### 150 **Study participants**

151 We received 1290 responses during the survey period. In terms of language, the  
152 distribution of responses was as follows: 1196 English, 71 Shona and 23 Ndebele. Of  
153 the 1290 participants who completed the survey, 122 were excluded from analysis for  
154 the following reasons (89 were based outside Zimbabwe, 4 were under the age of 18  
155 years, 26 were duplicate responses, and in 3 age was missing). We finally analysed  
156 1168 participants. The study participants were from all the 10 provinces of Zimbabwe  
157 and half (50.5%) were from Harare province which houses the capital city of the  
158 country.

### 159 **Socio-demographic characteristics of the study participants**

160 A total of 1168 participants were included in the study with a median age of 39 years  
161 (interquartile range; IQR: 32-49) and an age range of 19 – 89 years. Table 1 shows a  
162 summary of the socio-demographic characteristics of the participants. The majority of  
163 the study participants were in the 36-45 years age group. Females constituted (57.5%)  
164 while 36% were health care workers. A significantly higher proportion (92.6%) of  
165 participants was residing in an urban setting. About 41.2% of the participants reported  
166 having at least one chronic condition. More than 90% reported having a good health  
167 status and a similar proportion had tertiary education as the highest level of education  
168 achieved. About 5% reported having tested positive for COVID-19 at some point prior to  
169 the survey. Among health care workers, only 6% of them reported having been



170 diagnosed of COVID-19 prior to the survey. Additionally, about 37.9% of health care  
 171 workers reported having at least one chronic condition (results not shown in the table).  
 172 Table 1 shows a summary of the socio-demographic characteristics of the participants.

173 **Table 1. Socio-demographic characteristics of survey participants (N = 1,168)**

| Characteristics    | n (%)       | Vaccine uptake |              |
|--------------------|-------------|----------------|--------------|
|                    |             | Yes (n = 579)  | No (n = 589) |
| Age group (years)  |             |                |              |
| 18-25              | 125 (10.7)  | 53 (42.4)      | 72 (57.6)    |
| 26-35              | 308 (26.4)  | 141 (45.8)     | 167 (54.2)   |
| 36-45              | 365 (31.3)  | 186 (51.0)     | 179 (49.0)   |
| 46-55              | 214 (18.3)  | 109 (50.9)     | 105 (49.1)   |
| >55                | 156 (13.4)  | 90 (57.7)      | 66 (42.3)    |
| Sex                |             |                |              |
| Male               | 496 (42.5)  | 280 (56.5)     | 216 (43.5)   |
| Female             | 672 (57.5)  | 299 (44.5)     | 373 (55.5)   |
| Health care worker |             |                |              |
| Yes                | 420 (36.0)  | 234 (55.7)     | 186 (44.3)   |
| No                 | 748 (64.0)  | 345 (46.1)     | 403 (53.9)   |
| Chronic conditions |             |                |              |
| Yes                | 481 (41.2)  | 276 (57.4)     | 205 (42.6)   |
| No                 | 687 (58.8)  | 303 (44.1)     | 384 (55.9)   |
| Health status      |             |                |              |
| Good               | 1054 (90.2) | 520 (49.3)     | 534 (50.7)   |
| Not so good        | 114 (9.8)   | 59 (51.8)      | 55 (48.2)    |
| Tertiary education |             |                |              |
| Yes                | 1102 (94.3) | 547 (49.6)     | 555 (50.4)   |
| No                 | 66 (5.7)    | 32 (48.5)      | 34 (51.5)    |
| Residence          |             |                |              |
| Urban              | 1081 (92.6) | 544 (50.3)     | 537 (49.7)   |
| Rural              | 87 (7.4)    | 35 (40.2)      | 52 (59.8)    |
| Employment status  |             |                |              |
| Employed           | 955 (81.8)  | 465 (48.7)     | 490 (51.3)   |
| Not employed       | 103 (8.8)   | 58 (56.3)      | 45 (43.7)    |
| Student            | 110 (9.4)   | 56 (50.9)      | 54 (49.1)    |
| Medical Aid        |             |                |              |
| Yes                | 922 (78.9)  | 460 (49.9)     | 462 (50.1)   |
| No                 | 246 (21.1)  | 119 (48.4)     | 127 (51.6)   |
| Medical Home       |             |                |              |
| Yes                | 895 (76.6)  | 458 (51.2)     | 437 (48.8)   |

|                   |             |            |            |
|-------------------|-------------|------------|------------|
| No                | 273 (23.4)  | 121 (44.3) | 152 (57.7) |
| Telehealth access |             |            |            |
| Yes               | 665 (56.9)  | 341 (51.3) | 324 (48.7) |
| No                | 503 (43.1)  | 238 (47.3) | 265 (52.7) |
| Got COVID19       |             |            |            |
| Yes               | 57 (4.9)    | 19 (33.9)  | 38 (66.7)  |
| No                | 1111 (95.1) | 560 (50.4) | 551 (49.6) |

## 174 Uptake of the vaccine

175 Half (49.9%) of the participants indicated that they would accept the COVID-19 vaccine  
 176 if they are offered when it becomes available, about 31.1% were unsure of whether they  
 177 would take the vaccine or not and the other 19% indicated that they would reject the  
 178 vaccine outright. The proportion of vaccine uptake across the different age groups  
 179 differed. Among adults aged 55 years and older, about 57.9% were willing to get  
 180 vaccinated compared to only 43.9% in the 18-25 years age group. Among health care  
 181 workers, 56.3% reported having an intention to get vaccinated. Additionally, 57.9% of  
 182 those who reported having at least one chronic condition expressed willingness to get  
 183 vaccinated once the vaccine was available. Participants with a tertiary education were  
 184 indifferent about vaccination with 50% expressing interest. After combining responses  
 185 on our outcome variable, half (49.9%) of the study participants would accept the  
 186 vaccine, “Yes” (Would Accept) and the other half (50.1%) would not be vaccinated, “No”  
 187 (Unsure/Would reject).

## 188 Risk of contracting the COVID-19 infection

189 Among those who had been previously diagnosed of COVID-19, about 37% indicated  
 190 that their infection was not so severe, while the other 14% did not experience any

191 severe symptoms due to the infection. Additionally, about 37% indicated that they were  
192 not worried of the possibility of re-infection by the virus. Approximately 77% of the  
193 participants were worried about the possibility that they might contract the virus, while  
194 91% were worried about the possibility that a friend or a relative might catch the virus.  
195 Fig 1 shows the perceived risk of contracting COVID-19.

## 196 **Fig 1. Risk of contracting COVID-19**

### 197 **Perceived vaccine effectiveness and safety of the COVID-19 vaccine**

198 Approximately 76% of the participants did not think that the vaccine will be effective in  
199 reducing symptoms of the virus and another 72% indicated that they did not think that  
200 the vaccine will be effective in preventing infection. Slightly more than half (51%) of the  
201 participants indicated that they did not trust the government and other relevant  
202 authorities in ensuring that the vaccine is effective and safe. Fig 2 shows the perceived  
203 effectiveness and safety of the COVID-19 vaccine.

## 204 **Fig 2. Perceived vaccine effectiveness and safety of the COVID-19 vaccine**

### 205 **Decision to be vaccinated with the COVID-19 vaccine**

206 Among factors considered by participants in deciding to get vaccinated or not, we  
207 looked at convenience, availability, confidence in vaccine efficacy, vaccine  
208 effectiveness, and potential sources of advice. About 58% of the adults indicated that  
209 they would strongly consider vaccine effectiveness in their decision-making process. A  
210 similar proportion also identified free vaccine access and vaccine safety as important

211 factors in deciding whether to get vaccinated for COVID-19 or not. Fig 3 shows the  
212 preferences of the adults on the different factors assessed.

### 213 **Fig 3. Decision to be vaccinated with the COVID-19 vaccine**

#### 214 **Factors associated with intention to be vaccinated with the COVID-19** 215 **vaccine**

216 Different covariates were assessed on their association with intention to vaccinate using  
217 logistic regression analysis (Table 2). After adjusting for all covariates of interests,  
218 adults aged 55 years and older were two times more likely to get vaccinated when  
219 compared to those aged 18-25 years [Adjusted Odds Ratio (AOR): 2.04, 95% CI: (1.07  
220 – 3.87)]. Similarly, health care workers were 1.73 times more likely to get vaccinated  
221 when compared to non-health care workers [AOR: 1.73, [95% CI: (1.34 – 2.24)]. Being  
222 male [vs female AOR: 1.84, 95% CI: (1.44 – 2.36)] and having at least one chronic  
223 condition [vs no chronic condition AOR: 1.72, 95% CI: (1.32 – 2.25)] were significantly  
224 associated with intention to vaccinate. Participants who had been previously diagnosed  
225 of COVID-19 [vs no previous COVID-19 infection AOR: 0.45, 95% CI: (0.25 – 0.81)]  
226 were significantly less likely to get vaccinated. Not so good health status, tertiary  
227 education, and medical home (having a primary health care doctor) were associated  
228 with borderline likelihood of getting vaccinated. We assessed the same covariates  
229 among the health care workers sub group, and only being male [vs females, AOR: 1.92  
230 95% CI: (1.24 – 2.98)] was associated the likelihood of getting vaccinated.

#### 231 **Table 2. Bivariate and multivariable logistic regression model results**

|                    | Unadjusted Odds Ratio (UOR) and 95% CI |                    | Adjusted Odds Ratio (AOR) and 95% CI |                    |
|--------------------|----------------------------------------|--------------------|--------------------------------------|--------------------|
|                    | UOR                                    | 95% CI             | AOR                                  | 95% CI             |
| Age group (years)  |                                        |                    |                                      |                    |
| 18-25              | Ref                                    |                    | Ref                                  |                    |
| 26-35              | 1.15                                   | 0.75 – 1.75        | 1.57                                 | 0.89 – 2.75        |
| 36-45              | 1.41                                   | 0.94 – 2.13        | <b>1.84</b>                          | <b>1.04 – 3.28</b> |
| 46-55              | 1.41                                   | 0.90 – 2.20        | 1.75                                 | 0.95 – 3.23        |
| >55                | <b>1.85</b>                            | <b>1.15 – 2.98</b> | <b>2.04</b>                          | <b>1.07 – 3.87</b> |
| Sex                |                                        |                    |                                      |                    |
| Female             | Ref                                    |                    | Ref                                  |                    |
| Male               | <b>1.62</b>                            | <b>1.28 – 2.04</b> | <b>1.84</b>                          | <b>1.44 – 2.36</b> |
| Health care worker |                                        |                    |                                      |                    |
| No                 | Ref                                    |                    | Ref                                  |                    |
| Yes                | <b>1.47</b>                            | <b>1.16 – 1.87</b> | <b>1.73</b>                          | <b>1.34 – 2.24</b> |
| Chronic conditions |                                        |                    |                                      |                    |
| No                 | Ref                                    |                    | Ref                                  |                    |
| Yes                | <b>1.71</b>                            | <b>1.35 – 2.16</b> | <b>1.72</b>                          | <b>1.32 – 2.25</b> |
| Health status      |                                        |                    |                                      |                    |
| Good               | Ref                                    |                    | Ref                                  |                    |
| Not so good        | 0.91                                   | 0.62 – 1.34        | 1.13                                 | 0.74 – 1.72        |
| Tertiary education |                                        |                    |                                      |                    |
| No                 | Ref                                    |                    | Ref                                  |                    |
| Yes                | 1.05                                   | 0.64 – 1.72        | 1.13                                 | 0.66 – 1.91        |
| Residence          |                                        |                    |                                      |                    |
| Urban              | Ref                                    |                    | Ref                                  |                    |
| Rural              | 0.66                                   | 0.43 – 1.04        | 0.64                                 | 0.40 – 1.01        |
| Employment status  |                                        |                    |                                      |                    |
| Not employed       | Ref                                    |                    | Ref                                  |                    |
| Student            | 0.81                                   | 0.47 – 1.38        | 1.24                                 | 0.63 – 2.43        |
| Employed           | 0.74                                   | 0.49 – 1.11        | <b>0.63</b>                          | <b>0.40 – 0.99</b> |
| Medical Aid        |                                        |                    |                                      |                    |
| No                 | Ref                                    |                    | Ref                                  |                    |
| Yes                | 1.06                                   | 0.80 – 1.41        | 0.91                                 | 0.65 – 1.25        |
| Medical Home       |                                        |                    |                                      |                    |
| No                 | Ref                                    |                    | Ref                                  |                    |
| Yes                | <b>1.32</b>                            | <b>1.00 – 1.73</b> | 1.20                                 | 0.87 – 1.64        |
| Telehealth access  |                                        |                    |                                      |                    |
| No                 | Ref                                    |                    | Ref                                  |                    |
| Yes                | 1.17                                   | 0.93 – 1.48        | 1.18                                 | 0.92 – 1.51        |
| Got COVID19        |                                        |                    |                                      |                    |
| No                 | Ref                                    |                    | Ref                                  |                    |
| Yes                | <b>0.49</b>                            | <b>0.28 – 0.86</b> | <b>0.45</b>                          | <b>0.25 – 0.81</b> |

Statistical significance at 5% alpha is indicated by odds ratios in bold, CI: confidence interval, Ref: reference

category

232 .

233

## 234 **Discussion**

235 Our study was the first to assess the COVID-19 vaccine hesitancy at national level in  
236 Zimbabwe. The study findings showed that half of the study participants reported that  
237 they would accept the COVID-19 vaccine if it becomes available. The majority of the  
238 survey participants were uncertain about the effectiveness of the vaccine and lacked  
239 confidence on the safety of the vaccine. About half lacked trust in the government's  
240 ability to ensure that the vaccine will be effective and most participants would seek the  
241 advice of a healthcare worker first before getting vaccinated. Increased age, presence  
242 of chronic disease/condition, male gender and being a healthcare worker were  
243 associated with increased likelihood of vaccine acceptance while a history of COVID-19  
244 infection and rural residence were associated with reduced likelihood of vaccine  
245 acceptance.

246 Our study findings showed that half of the participants (50%) were willing to take the  
247 COVID-19 vaccine while the other half were either unsure or would reject taking the  
248 vaccine. These findings are consistent with other African studies from the Democratic  
249 Republic of Congo (DRC) (56%) (17), and Nigeria (50%) (18). The similarities in  
250 findings may be due to resemblances in the methodology used, as well as socio-  
251 economic and political settings in DRC, Nigeria and Zimbabwe. However, a South  
252 African survey showed that about 71% were willing to get vaccinated against COVID-19  
253 (19). Based on the significant difference in vaccine acceptance for this study and the

254 South African study, one might hypothesize that South Africans were more likely to  
255 accept the vaccine given the high numbers of reported COVID-19 cases and fatalities  
256 as compared to the other countries (DRC, Nigeria and Zimbabwe).

257 Moreover, the surveys from DRC, Nigeria and this study were conducted before the  
258 vaccine was rolled out and conspiracy theories on the COVID-19 vaccine were at their  
259 peak thus, the researchers predict an increase in vaccine acceptance as more accurate  
260 information penetrates the population, more people getting vaccinated and vaccine  
261 effectiveness being witnessed in those who would have been vaccinated. The level of  
262 vaccine hesitancy found in our study was low when compared to the required COVID-19  
263 herd immunity i.e. 60-70% (20). A COVID-19 vaccine uptake of 50% may not be  
264 adequate based on Zimbabwean government's plans to vaccinate 60% of the  
265 population as a way of reaching the herd immunity threshold (21). Therefore, there is a  
266 need to come up with strategies to increase the proportion of citizens willing to get the  
267 COVID-19 vaccine. Strategies that have been shown to increase COVID-19 vaccine  
268 uptake include engagement of community leaders, social mobilization tactics, mass  
269 media campaigns, the use of reminder and follow-up systems, training and education of  
270 health care professionals, incentives, vaccine mandates, efforts to make vaccine more  
271 accessible, and efforts to increase general knowledge and awareness (22,23).

272 Healthcare workers who took part in this study were more likely to accept the COVID-19  
273 vaccine and this finding corroborated with a study in the U.S (24). It can be  
274 hypothesised that healthcare workers perceived their susceptibility to contract COVID-  
275 19 as high as evidenced by a study which reported that healthcare workers had a more  
276 than seven-fold higher risk of severe COVID-19 across all occupational groups (25).

277 Since health providers have the moral obligation not to harm their patient (26), they may  
278 feel compelled to protect the sick and vulnerable patients by getting vaccinated  
279 themselves. This is a decisive finding since healthcare workers' vaccine acceptance can  
280 easily untangle vaccine hesitancy when recommending the vaccine to their clients. The  
281 health providers can also serve as role models of vaccine acceptance for the general  
282 population. Efforts to combat COVID-19 vaccine hesitancy among the general  
283 population can utilize the increased intention to vaccinate among health workers by  
284 making them community outreach vaccine advocates.

285 Most of the study participants doubted the effectiveness of the COVID-19 vaccine. This  
286 was consistent with findings from an African study where despite the respondents'  
287 agreement with the importance of vaccinating the population against SARS-CoV-2,  
288 many had reservations about the effectiveness and safety of the vaccine (27). The  
289 doubting of the effectiveness could be attributed to several reasons. Firstly, this could  
290 be attributed to the lack of information on how the vaccine was developed and tested.  
291 There has been concern on how some vaccines were developed with people preferring  
292 those thought to have been developed transparently in comparison to those whose  
293 development was shrouded with secrecy (28,29). Secondly, there were concerns on  
294 whether trials were not rushed and regulatory standards relaxed considering the  
295 unprecedented speed at which the COVID-19 vaccines were developed (30). The lack  
296 of lucid information on vaccine development exacerbates the vaccine hesitancy problem  
297 and it is essential for health authorities to be equipped with authentic information on  
298 how the COVID vaccines were developed; thus enabling them to disseminate factual  
299 information and allay the vaccine effectiveness related anxieties.



300 The perceived lack of acceptance of the COVID-19 vaccine in Zimbabwe can partly be  
301 attributed to earlier reports on safety of the COVID-19 vaccines with respect to possible  
302 side- and adverse effects (31). Some Zimbabweans became sceptical and reserved  
303 towards the vaccine especially after experts questioned the effectiveness of the  
304 vaccines developed before the 501.V2 coronavirus variant which originated from South  
305 Africa and appeared to be a more contagious strain infiltrating the country (21). The  
306 widespread dissemination of vaccine safety information should be done before rolling  
307 out the vaccine to ensure that people make an informed decision based on scientifically  
308 proven information instead of rumours and conspiracy theories. The health authorities  
309 should continue to update citizens about vaccine side-effects and institute strong  
310 pharmacovigilant systems as well as, compensation schemes for severe adverse  
311 events as this might boost public confidence in vaccine safety (32,33).

312 About half of the participants in this study lacked trust on whether the government and  
313 relevant authorities would be able to provide a safe vaccine that would protect them  
314 from COVID-19. Such public insecurities were also observed in other studies on vaccine  
315 hesitancy (34,35). These public insecurities may be caused by unsubstantiated political  
316 statements, incapacities of the health system and centralisation of health services.  
317 Unscientific claims on COVID-19 by individuals in positions of authority can introduce  
318 uncertainties within the population and lower their trust in how the government is  
319 handling the pandemic. The Zimbabwean healthcare system is facing serious  
320 challenges including shortage of essential drugs, lack of equipment to carry out basic  
321 procedures, and skills migration thus, citizens may lack trust in the system's ability to  
322 contain the pandemic. Despite the proposed free COVID-19 vaccination, there are other

323 indirect costs that could be incurred by citizens to get to the vaccination sites which are  
324 currently centralised at secondary and tertiary health facilities. Travelling costs and loss  
325 of productive time could be potential barriers to COVID-19 vaccination in low-income  
326 settings like Zimbabwe. Thus, the government should work towards increasing the  
327 national health budget to cater for the excess service demand caused by the pandemic.  
328 It is also critical to decentralize vaccination sites and to use influential community  
329 leaders for community outreach activities.

330 The current study also revealed that an increase in age and the presence of a chronic  
331 condition were associated with a high likelihood of vaccine acceptance. These findings  
332 are consistent with findings from other studies that showed a strong association  
333 between age and willingness to get vaccinated (35,36). The risk of severe COVID-19  
334 increases with age and 80% of COVID-19 deaths are of adults 65 years and older (37).  
335 Additionally, multiple chronic conditions complicate the progression of COVID-19 (38).  
336 Thus, the elderly and those with chronic conditions may have increased perceived  
337 vulnerability to the disease and are more likely to take steps towards protecting  
338 themselves.

339 We noted that males were more likely to accept the vaccine. Several other studies also  
340 revealed similar results (27,28,39–41). This was an unexpected finding given the poor  
341 health seeking behaviour among men (42). However, men constitutes the highest  
342 proportion of the Zimbabwean workforce and the speculations that some organisations  
343 might prioritise or mandate vaccination among their employees to continue productivity  
344 in wake of anticipated lockdowns might have influenced men's decision. The reduced  
345 vaccine acceptance among women can be attributed to a lack of information of the

346 safety of the vaccine especially with regards to conception related matters; however  
347 experts believe that the vaccines were unlikely to pose a risk to pregnant and lactating  
348 woman (43). The finding that among the health care worker subgroup, males were also  
349 likely to be vaccinated than females can be explained by some of the reasons  
350 discussed above. Health authorities have the responsibility to give women updated  
351 information on the safety of the vaccine during the community outreach activities. It was  
352 surprising to note that 39% of those who reported previous COVID-19 infection in this  
353 study were less likely to be vaccinated. This is despite the fact that those with a history  
354 of prior infection could be reinfected by SARS-CoV-2 even after recovering from the  
355 initial infection (44). Studies have shown that primary infection only provides short term  
356 protective immunity against SARS-CoV-2 (45–47). Individuals who would have  
357 recovered from coronavirus infection may perceive their susceptibility as low assuming  
358 that they would have garnered natural immunity. Although those who have been  
359 previously infected by SARS-CoV-2 are less likely to have a repeat infection when  
360 compared to those without evidence of previous infection, they are still susceptible to  
361 reinfection (48), hence, the need to be vaccinated as well.

362 The present study noted that rural residents were less likely to pursue COVID-19  
363 vaccination when compared to those residing in urban areas. This finding corroborates  
364 with findings from other similar studies (28,34,49). This could be attributed to poor  
365 information penetration and reduced perceived susceptibility risk among the rural folks.  
366 The finding can also be explained by the fact that rural residents have reduced health  
367 literacy and awareness, reduced trust and interaction with healthcare workers, and  
368 presumed cost-based concerns (34,50,51). Information travels faster in urban areas

369 where mass media and internet connection are readily available thus, it can be easier  
370 for those residing in urban areas to access authentic information about the vaccine  
371 when compared to most remote rural areas in Zimbabwe. This shows the importance of  
372 tailoring vaccine awareness strategies relative to populations residing in varying  
373 geographical regions. The authors recommend that policy makers consider  
374 geographical- and socio-cultural-specific information for education and communication  
375 when approaching the diverse residential settings.

## 376 **Strengths and limitations**

377 Our study assessed a broad range of factors that have been known to influence vaccine  
378 acceptance. The findings can be used to guide future health activities with an aim of  
379 improving COVID-19 vaccine uptake or uptake of other vaccines. All the ten  
380 Zimbabwean provinces were represented although some were more represented than  
381 others. The data collection tools were distributed in all the three common languages  
382 used in Zimbabwe to accommodate the majority of citizens. The study received a fairly  
383 good response rate, which was unexpected by the researchers given that no incentives  
384 were given to cover internet connection fees. The increased use of internet services  
385 during the COVID-19 era enabled swift and cost effective online data collection on the  
386 part of the researchers.

387 Despite the relatively large sample size, the generalizability of our findings can be  
388 hampered by our sampling method. The researchers used mainly their social media  
389 networks as proxies for distributing the data collection tool. The study was also limited  
390 to those who had access to mobile phones, tablets, or computers, thus introducing a

391 selection bias. We may have excluded the poor and the old who in fact are vulnerable  
392 to COVID-19. Besides, the data were collected before the vaccine was rolled out in the  
393 country and vaccine hesitancy may have waned as more authentic information became  
394 available to the population. The participants were mostly urban dwellers with easy  
395 access to internet connection and this could have potentially resulted in a selection bias  
396 leaving the rural population. The fact that this study utilized self-reported data makes it  
397 vulnerable to reporting bias.

398 There is a need for further studies to understand how COVID-19 vaccine hesitancy will  
399 evolve with time. With the COVID-19 vaccine now available in the country and already  
400 being given, studies should be conducted periodically to assess the time-sensitive  
401 aspect of the vaccine hesitancy among those who rejected the vaccine or were unsure  
402 of it. Our study reported the quantitative findings associated with COVID-19 vaccine;  
403 there is therefore a need for qualitative studies to explore contextual and other  
404 individual factors that lead to vaccine hesitancy. Since in our study we were unable to  
405 report vaccine hesitancy among targeted sectors of the populations e.g. education,  
406 commerce, tourism among others, studies are required to assess how vaccine  
407 hesitancy will vary across these sectors. These will enable targeted messaging to  
408 improve the vaccine uptake. Though we assessed vaccine hesitancy among health care  
409 workers, we were unable to disentangle our data to find out hesitancy among various  
410 groups of healthcare workers. Future studies looking into vaccine hesitancy among  
411 health care workers should be in position to assess vaccine hesitancy among doctors,  
412 nurses, pharmacists and many other healthcare worker professionals. To try and be  
413 more representative, especially inclusion of the rural communities, future studies should

414 be conducted physically so that the barrier of access to internet and electronic gadgets  
415 can be bridged. However, strategies to mitigate against COVID-19 infection and spread  
416 should be observed.

## 417 **Conclusions**

418 In our study, we found half of the participants were willing to get vaccinated against  
419 COVID-19 with the majority lacking trust in the government and being uncertain about  
420 vaccine effectiveness and safety. The high vaccine acceptance among health workers  
421 and the finding that the majority will consult health care workers before deciding to  
422 vaccinate, can be a good foundation to launch a successful COVID-19 vaccine  
423 awareness campaign in the country. However, the level of vaccination uptake is way  
424 below the expected herd immunity hence the government and other relevant authorities  
425 should provide timely and accurate information through community-wide campaigns.  
426 Strategies should also be put in place to target and prioritise groups likely not to  
427 vaccinate such as females, younger ages and those without chronic conditions. The  
428 government and other relevant authorities should aim for a more transparent strategy  
429 since it will contribute to public trust and increased acceptability of the vaccine.

## 430 **Acknowledgements**

431 The authors would like to thank the following organisations for the support during the  
432 study; the University of Zimbabwe, Faculty of Medicine and Health Sciences, Global  
433 and Public Health Unit, Africa University, College of Health, Agriculture & Natural  
434 Science, Clinical Research Centre (AUCRC) and the Zimbabwe College of Public

435 Health Physicians (ZCPHP). The authors would like to thank the following individuals  
436 Mandla Tirivavi from AUCRC for administrative support, Brian Maponga and Pamela  
437 Magande from the ZCPHP for facilitating the distribution of the survey and ethical  
438 approval. Finally, we thank all the Zimbabweans who participated in the survey.

## 439 Authors Contributions

| Author                   | Contribution                                                                                                                                                     |
|--------------------------|------------------------------------------------------------------------------------------------------------------------------------------------------------------|
| Paddington T. Mundagowa  | Conceptualisation, Methodology, Investigation, Validation, Writing – original draft preparation, Writing – review & editing                                      |
| Samantha N. Tozivepi     | Conceptualisation, Methodology, Investigation, Data curation, Validation, Writing – original draft preparation, Writing – review & editing                       |
| Edward T. Chiyaka        | Conceptualisation, Methodology, Formal Analysis, Validation, Writing – original draft preparation, Writing – review & editing                                    |
| Fadzai Mukora-Mutseyekwa | Conceptualisation, Methodology, Project administration, Supervision, Resources, Funding Acquisition, Writing – review & editing                                  |
| Richard Makurumidze      | Conceptualisation, Methodology, Investigation, Validation, Project administration, Supervision, Writing – original draft preparation, Writing – review & editing |

## 440 Declarations

## 441 Data Availability

442 The data used during analysis is available from the corresponding author upon a  
443 reasonable request.

## 444 **Funding**

445 The study received funding for ethical approval from the Africa University, College of  
446 Health, Agriculture & Natural Science, Clinical Research Centre. The funders had no  
447 role in study design, data collection and analysis, decision to publish, or preparation of  
448 the manuscript.

## 449 **Competing Interests**

450 The authors declare that they have no competing interests.

## 451 **References**

- 452 1. WHO. WHO Coronavirus (COVID-19) Dashboard [Internet]. 2021 [cited 2021 May  
453 28]. Available from: <https://covid19.who.int/>
- 454 2. Jahanshahi AA, Dinani MM, Madavani AN, Li J, Zhang SX. The distress of Iranian  
455 adults during the Covid-19 pandemic – More distressed than the Chinese and  
456 with different predictors. *Brain Behav Immun* [Internet]. 2020 Jul;87:124–5.  
457 Available from: <https://linkinghub.elsevier.com/retrieve/pii/S0889159120307121>
- 458 3. Mukaetova-Ladinska EB, Kronenberg G. Psychological and neuropsychiatric  
459 implications of COVID-19. *Eur Arch Psychiatry Clin Neurosci* [Internet]. 2021 Mar  
460 22;271(2):235–48. Available from: [http://link.springer.com/10.1007/s00406-020-](http://link.springer.com/10.1007/s00406-020-01210-2)  
461 01210-2



- 462 4. Morgantini LA, Naha U, Wang H, Francavilla S, Acar Ö, Flores JM, Crivellaro S,  
463 Moreira D, Abern M, Eklund M, Vigneswaran HT WS. Factors contributing to  
464 healthcare professional burnout during the COVID-19 Pandemic: A rapid  
465 turnaround global survey. PLoS One. 2020;15(9).
- 466 5. WHO. Draft Landscape of COVID-19 Candidate Vaccines [Internet]. Geneva;  
467 2021. Available from: [https://www.who.int/publications/m/item/draft-landscape-of-](https://www.who.int/publications/m/item/draft-landscape-of-covid-19-candidate-vaccines)  
468 [covid-19-candidate-vaccines](https://www.who.int/publications/m/item/draft-landscape-of-covid-19-candidate-vaccines)
- 469 6. Anderson RM, Vegvari C, Truscott J, Collyer BS. Challenges in creating herd  
470 immunity to SARS-CoV-2 infection by mass vaccination. Lancet [Internet]. 2020  
471 Nov;396(10263):1614–6. Available from:  
472 <https://linkinghub.elsevier.com/retrieve/pii/S0140673620323187>
- 473 7. WHO. Ten threats to global health in 2019 [Internet]. World Health Organization.  
474 2019 [cited 2021 May 28]. Available from: [https://www.who.int/news-](https://www.who.int/news-room/spotlight/ten-threats-to-global-health-in-2019)  
475 [room/spotlight/ten-threats-to-global-health-in-2019](https://www.who.int/news-room/spotlight/ten-threats-to-global-health-in-2019)
- 476 8. WHO. Infodemic management- infodermiology [Internet]. World Health  
477 Organization. 2020 [cited 2021 Jan 19]. Available from:  
478 <https://www.who.int/teams/risk-communication/infodemic-messaging>
- 479 9. MacDonald NE. Vaccine hesitancy: Definition, scope and determinants. Vaccine  
480 [Internet]. 2015 Aug;33(34):4161–4. Available from:  
481 <https://linkinghub.elsevier.com/retrieve/pii/S0264410X15005009>
- 482 10. MoHCC. COVID-19 vaccination gets traction [Internet]. Ministry of Health and  
483 Child Care, Zimbabwe. 2021 [cited 2021 Jan 19]. Available from:  
484 [http://www.mohcc.gov.zw/index.php?option=com\\_content&view=article&id=355:c](http://www.mohcc.gov.zw/index.php?option=com_content&view=article&id=355:c)

- 485 ovid-19-vaccination-gets-traction&catid=84&Itemid=435
- 486 11. Worldometer. Zimbabwe population 2021 [Internet]. Worldometer. 2021 [cited  
487 2021 May 28]. Available from: [https://www.worldometers.info/world-](https://www.worldometers.info/world-population/zimbabwe-population/#:~:text=Zimbabwe 2020 population is estimated,year according to UN data.)  
488 [population/zimbabwe-population/#:~:text=Zimbabwe 2020 population is](https://www.worldometers.info/world-population/zimbabwe-population/#:~:text=Zimbabwe 2020 population is estimated,year according to UN data.)  
489 [estimated,year according to UN data.](https://www.worldometers.info/world-population/zimbabwe-population/#:~:text=Zimbabwe 2020 population is estimated,year according to UN data.)
- 490 12. ZIMSTAT. Census 2012 Preliminary Report. Harare; 2012.
- 491 13. Ministry of Health and Child Care(MoHCC). Situation report COVID-19,  
492 Zimbabwe. Harare; 2021.
- 493 14. Topline Research Solutions. Zimbabweans opinion survey: How best to assist the  
494 COVID 19 situation in Zimbabwe [Internet]. Harare; 2020. Available from:  
495 [https://www.google.com/url?sa=t&rct=j&q=&esrc=s&source=web&cd=&ved=2ahU](https://www.google.com/url?sa=t&rct=j&q=&esrc=s&source=web&cd=&ved=2ahUKEWj5ieON1fTwAhWFGuwKHeoCBWlQFjABegQlAxAD&url=https%3A%2F%2Ftopliners.co.za%2Fwp-content%2Fuploads%2F2021%2F01%2FProject-Hondo-FINAL-Report-14-Jan-2021.pdf&usg=AOvVaw2pLvghxJPnqKi4xAlg)  
496 [KEWj5ieON1fTwAhWFGuwKHeoCBWlQFjABegQlAxAD&url=https%3A%2F%2F](https://www.google.com/url?sa=t&rct=j&q=&esrc=s&source=web&cd=&ved=2ahUKEWj5ieON1fTwAhWFGuwKHeoCBWlQFjABegQlAxAD&url=https%3A%2F%2Ftopliners.co.za%2Fwp-content%2Fuploads%2F2021%2F01%2FProject-Hondo-FINAL-Report-14-Jan-2021.pdf&usg=AOvVaw2pLvghxJPnqKi4xAlg)  
497 [opliners.co.za%2Fwp-content%2Fuploads%2F2021%2F01%2FProject-Hondo-](https://www.google.com/url?sa=t&rct=j&q=&esrc=s&source=web&cd=&ved=2ahUKEWj5ieON1fTwAhWFGuwKHeoCBWlQFjABegQlAxAD&url=https%3A%2F%2Ftopliners.co.za%2Fwp-content%2Fuploads%2F2021%2F01%2FProject-Hondo-FINAL-Report-14-Jan-2021.pdf&usg=AOvVaw2pLvghxJPnqKi4xAlg)  
498 [FINAL-Report-14-Jan-2021.pdf&usg=AOvVaw2pLvghxJPnqKi4xAlg](https://www.google.com/url?sa=t&rct=j&q=&esrc=s&source=web&cd=&ved=2ahUKEWj5ieON1fTwAhWFGuwKHeoCBWlQFjABegQlAxAD&url=https%3A%2F%2Ftopliners.co.za%2Fwp-content%2Fuploads%2F2021%2F01%2FProject-Hondo-FINAL-Report-14-Jan-2021.pdf&usg=AOvVaw2pLvghxJPnqKi4xAlg)
- 499 15. Lin C, Tu P, Beitsch LM. Confidence and receptivity for covid-19 vaccines: A rapid  
500 systematic review. *Vaccines*. 2021;9(1):1–32.
- 501 16. COVID Collaborative. Coronavirus Vaccine Hesitancy in Black and Latinx  
502 Communities [Internet]. COVID Collaborative. 2020 [cited 2021 Jun 6]. Available  
503 from: [https://www.covidcollaborative.us/content/vaccine-treatments/coronavirus-](https://www.covidcollaborative.us/content/vaccine-treatments/coronavirus-vaccine-hesitancy-in-black-and-latinx-communities)  
504 [vaccine-hesitancy-in-black-and-latinx-communities](https://www.covidcollaborative.us/content/vaccine-treatments/coronavirus-vaccine-hesitancy-in-black-and-latinx-communities)
- 505 17. Ditekemena JD, Nkamba DM, Mutwadi A, Mavoko HM, Siewe Fodjo JN, Luhata  
506 C, et al. COVID-19 Vaccine Acceptance in the Democratic Republic of Congo: A  
507 Cross-Sectional Survey. *Vaccines* [Internet]. 2021 Feb 14;9(2):153. Available

- 508 from: <https://www.mdpi.com/2076-393X/9/2/153>
- 509 18. Tobin E, Okonofua M, Azeke A, Ajekweneh V, Akpede G. Willingness to  
510 acceptance a COVID-19 vaccine in Nigeria: a population-based cross-sectional  
511 study. *J Med Res*. 2021;5(2):1–6.
- 512 19. Monama T. 71% of South Africans are willing to take the COVID-19 vaccine  
513 [Internet]. 2021. Available from:  
514 [https://www.news24.com/news24/southafrica/news/71-of-south-africans-are-](https://www.news24.com/news24/southafrica/news/71-of-south-africans-are-willing-to-take-the-covid-19-vaccine-study-20210512)  
515 [willing-to-take-the-covid-19-vaccine-study-20210512](https://www.news24.com/news24/southafrica/news/71-of-south-africans-are-willing-to-take-the-covid-19-vaccine-study-20210512)
- 516 20. Wang W, Wu Q, Yang J, Dong K, Chen X, Bai X, et al. Global, regional, and  
517 national estimates of target population sizes for covid-19 vaccination: descriptive  
518 study. *BMJ* [Internet]. 2020 Dec 15;m4704. Available from:  
519 <https://www.bmj.com/lookup/doi/10.1136/bmj.m4704>
- 520 21. Mavhunga C. Government urges Zimbabweans to accept COVID-19 Vaccine.  
521 VOA News [Internet]. 2021 Feb 13; Available from:  
522 [https://www.voanews.com/covid-19-pandemic/government-urges-zimbabweans-](https://www.voanews.com/covid-19-pandemic/government-urges-zimbabweans-accept-covid-19-vaccine)  
523 [accept-covid-19-vaccine](https://www.voanews.com/covid-19-pandemic/government-urges-zimbabweans-accept-covid-19-vaccine)
- 524 22. Jarrett C, Wilson R, O’Leary M, Eckersberger E, Larson HJ. Strategies for  
525 addressing vaccine hesitancy – A systematic review. *Vaccine* [Internet]. 2015  
526 Aug;33(34):4180–90. Available from:  
527 <https://linkinghub.elsevier.com/retrieve/pii/S0264410X15005046>
- 528 23. Gayle H, Foege W, Brown L, Kahn B. Framework for Equitable Allocation of  
529 COVID-19 Vaccine: Achieving Acceptance of COVID-19 Vaccine. National  
530 Academies of Sciences, Engineering, and Medicine. 2020.

- 531 24. Shaw J, Stewart T, Anderson KB, Hanley S, Thomas SJ, Salmon DA, et al.  
532 Assessment of US Healthcare Personnel Attitudes Towards Coronavirus Disease  
533 2019 (COVID-19) Vaccination in a Large University Healthcare System. Clin  
534 Infect Dis [Internet]. 2021 Jan 25; Available from:  
535 <https://academic.oup.com/cid/advance-article/doi/10.1093/cid/ciab054/6118651>
- 536 25. Mutambudzi M, Niedzwiedz C, Macdonald EB, Leyland A, Mair F, Anderson J, et  
537 al. Occupation and risk of severe COVID-19: prospective cohort study of 120 075  
538 UK Biobank participants. Occup Environ Med [Internet]. 2021 May;78(5):307–14.  
539 Available from: <https://oem.bmj.com/lookup/doi/10.1136/oemed-2020-106731>
- 540 26. Gur-Arie R, Jamrozik E, Kingori P. No Jab, No Job? Ethical Issues in Mandatory  
541 COVID-19 Vaccination of Healthcare Personnel. BMJ Glob Heal [Internet]. 2021  
542 Feb 17;6(2):e004877. Available from:  
543 <https://gh.bmj.com/lookup/doi/10.1136/bmjgh-2020-004877>
- 544 27. Africa Centres for Disease Control and Prevention, London School of Hygiene  
545 and Tropical Medicine's Vaccine Confidence Project, Orb International. COVID 19  
546 Vaccine Perceptions: A 15 country study. 2021;(February):1–70.
- 547 28. El-Elimat T, AbuAISamen MM, Almomani BA, Al-Sawalha NA, Alali FQ.  
548 Acceptance and attitudes toward COVID-19 vaccines: A cross-sectional study  
549 from Jordan. medRxiv [Internet]. 2020;(816):1–15. Available from:  
550 <http://dx.doi.org/10.1371/journal.pone.0250555>
- 551 29. Pogue K, Jensen JL, Stancil CK, Ferguson DG, Hughes SJ, Mello EJ, et al.  
552 Influences on Attitudes Regarding Potential COVID-19 Vaccination in the United  
553 States. Vaccines [Internet]. 2020 Oct 3;8(4). Available from:

- 554 <http://www.ncbi.nlm.nih.gov/pubmed/33022917>
- 555 30. Shah A, Marks PW, Hahn SM. Unwavering Regulatory Safeguards for COVID-19  
556 Vaccines. JAMA [Internet]. 2020 Sep 8;324(10):931. Available from:  
557 <https://jamanetwork.com/journals/jama/fullarticle/2769421>
- 558 31. Everington K. Full list of adverse reactions from China's Sinopharm vaccine  
559 revealed. Taiwan News [Internet]. 2021 Jan 11; Available from:  
560 <https://www.taiwannews.com.tw/en/news/4098913>
- 561 32. Chandler RE. Optimizing safety surveillance for COVID-19 vaccines. Nat Rev  
562 Immunol [Internet]. 2020 Aug 17;20(8):451–2. Available from:  
563 <http://www.nature.com/articles/s41577-020-0372-8>
- 564 33. Halabi S, Heinrich A, Omer SB. No-Fault Compensation for Vaccine Injury — The  
565 Other Side of Equitable Access to Covid-19 Vaccines. N Engl J Med [Internet].  
566 2020 Dec 3;383(23):e125. Available from:  
567 <http://www.nejm.org/doi/10.1056/NEJMp2030600>
- 568 34. Fisher KA, Bloomstone SJ, Walder J, Crawford S, Fouayzi H, Mazor KM.  
569 Attitudes Toward a Potential SARS-CoV-2 Vaccine. Ann Intern Med [Internet].  
570 2020 Dec 15;173(12):964–73. Available from:  
571 <https://www.acpjournals.org/doi/10.7326/M20-3569>
- 572 35. Soares P, Rocha JV, Moniz M, Gama A, Laires PA, Pedro AR, et al. Factors  
573 associated with COVID-19 vaccine hesitancy. Vaccines. 2021;9(3):1–14.
- 574 36. Lazarus J V., Wyka K, Rauh L, Rabin K, Ratzan S, Gostin LO, et al. Hesitant or  
575 Not? The Association of Age, Gender, and Education with Potential Acceptance  
576 of a COVID-19 Vaccine: A Country-level Analysis. J Health Commun [Internet].

- 577 2020 Oct 2;25(10):799–807. Available from:  
578 <https://www.tandfonline.com/doi/full/10.1080/10810730.2020.1868630>
- 579 37. CDC. Older Adults at greater risk of requiring hospitalization or dying if diagnosed  
580 with COVID-19 [Internet]. Center for Disease Control and Prevention. 2021.  
581 Available from: [https://www.cdc.gov/coronavirus/2019-ncov/need-extra-](https://www.cdc.gov/coronavirus/2019-ncov/need-extra-precautions/older-adults.html)  
582 [precautions/older-adults.html](https://www.cdc.gov/coronavirus/2019-ncov/need-extra-precautions/older-adults.html)
- 583 38. Liu K, Chen Y, Lin R, Han K. Clinical features of COVID-19 in elderly patients: A  
584 comparison with young and middle-aged patients. *J Infect* [Internet]. 2020  
585 Jun;80(6):e14–8. Available from:  
586 <https://linkinghub.elsevier.com/retrieve/pii/S016344532030116X>
- 587 39. Alqudeimat Y, Alenezi D, AlHajri B, Alfouzan H, Almokhaizeem Z, Altamimi S, et  
588 al. Acceptance of a COVID-19 Vaccine and its Related Determinants among the  
589 General Adult Population in Kuwait. *Med Princ Pract* [Internet]. 2021 Jan 22;  
590 Available from: <https://www.karger.com/Article/FullText/514636>
- 591 40. Malik AA, McFadden SM, Elharake J, Omer SB. Determinants of COVID-19  
592 vaccine acceptance in the US. *EClinicalMedicine* [Internet]. 2020 Sep;26:100495.  
593 Available from: <https://linkinghub.elsevier.com/retrieve/pii/S258953702030239X>
- 594 41. Wong LP, Alias H, Wong P-F, Lee HY, AbuBakar S. The use of the health belief  
595 model to assess predictors of intent to receive the COVID-19 vaccine and  
596 willingness to pay. *Hum Vaccin Immunother* [Internet]. 2020 Sep 1;16(9):2204–  
597 14. Available from:  
598 <https://www.tandfonline.com/doi/full/10.1080/21645515.2020.1790279>
- 599 42. Mufunda E, Albin B, Hjelm K. Differences in Health and Illness Beliefs in

- 600 Zimbabwean Men and Women with Diabetes. *Open Nurs J* [Internet]. 2012 Aug  
601 6;6:117–25. Available from: [http://benthamopen.com/ABSTRACT/TONURSJ-6-](http://benthamopen.com/ABSTRACT/TONURSJ-6-117)  
602 117
- 603 43. CDC. COVID-19 Vaccines While Pregnant or Breastfeeding [Internet]. Center for  
604 Disease Control and Prevention. 2021 [cited 2021 May 28]. Available from:  
605 [https://www.cdc.gov/coronavirus/2019-](https://www.cdc.gov/coronavirus/2019-ncov/vaccines/recommendations/pregnancy.html)  
606 [ncov/vaccines/recommendations/pregnancy.html](https://www.cdc.gov/coronavirus/2019-ncov/vaccines/recommendations/pregnancy.html)
- 607 44. Tillett RL, Sevinsky JR, Hartley PD, Kerwin H, Crawford N, Gorzalski A, et al.  
608 Genomic evidence for reinfection with SARS-CoV-2: a case study. *Lancet Infect*  
609 *Dis* [Internet]. 2021;21(1):52–8. Available from: [http://dx.doi.org/10.1016/S1473-](http://dx.doi.org/10.1016/S1473-3099(20)30764-7)  
610 [3099\(20\)30764-7](http://dx.doi.org/10.1016/S1473-3099(20)30764-7)
- 611 45. Abu-Raddad LJ, Chemaitelly H, Malek JA, Ahmed AA, Mohamoud YA,  
612 Younuskunju S, et al. Assessment of the Risk of Severe Acute Respiratory  
613 Syndrome Coronavirus 2 (SARS-CoV-2) Reinfection in an Intense Reexposure  
614 Setting. *Clin Infect Dis*. 2020;2.
- 615 46. Edridge E, Kaczorowska J, Hoste A, Baker M, Klein M, Loens K, et al. Seasonal  
616 coronavirus protective immunity is short-lasting. *Nat Med*. 2020;11:1691–3.
- 617 47. McMahon A, Robb NC. Reinfection with SARS-CoV-2: Discrete SIR (Susceptible,  
618 Infected, Recovered) Modeling Using Empirical Infection Data. *JMIR Public Heal*  
619 *Surveill* [Internet]. 2020 Nov 16;6(4):e21168. Available from:  
620 <http://publichealth.jmir.org/2020/4/e21168/>
- 621 48. Letizia AG, Ge Y, Vangeti S, Goforth C, Weir DL, Kuzmina NA, et al. Articles  
622 SARS-CoV-2 seropositivity and subsequent infection risk in healthy young

623 adults: a prospective cohort study. *Lancet Respir [Internet]*. 2021;2600(21):1–9.

624 Available from: [http://dx.doi.org/10.1016/S2213-2600\(21\)00158-2](http://dx.doi.org/10.1016/S2213-2600(21)00158-2)

625 49. Khubchandani J, Sharma S, Price JH, Wiblishauser MJ, Sharma M, Webb FJ.

626 COVID-19 Vaccination Hesitancy in the United States: A Rapid National

627 Assessment. *J Community Health [Internet]*. 2021 Apr 3;46(2):270–7. Available

628 from: <http://link.springer.com/10.1007/s10900-020-00958-x>

629 50. Ferdinand KC, Nedunchezian S, Reddy TK. The COVID-19 and Influenza

630 “Twindemic”: Barriers to Influenza Vaccination and Potential Acceptance of

631 SARS-CoV2 Vaccination in African Americans. *J Natl Med Assoc [Internet]*. 2020

632 Dec;112(6):681–7. Available from:

633 <https://linkinghub.elsevier.com/retrieve/pii/S0027968420304089>

634 51. Quinn SC, Jamison AM, Freimuth V. Communicating Effectively About

635 Emergency Use Authorization and Vaccines in the COVID-19 Pandemic. *Am J*

636 *Public Health [Internet]*. 2021 Mar;111(3):355–8. Available from:

637 <https://ajph.aphapublications.org/doi/full/10.2105/AJPH.2020.306036>

638

639

640

641



Apart from yourself, how worried are you, if at all, about the possibility that some of your close friends or family members might catch the coronavirus?

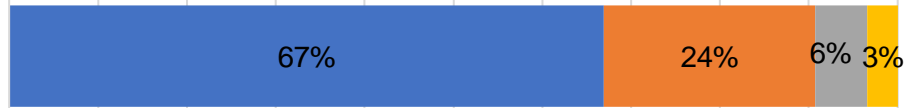

How worried are you, if at all, about the possibility that you might catch the coronavirus?

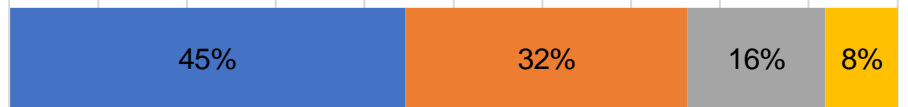

How worried are you, if at all, about the possibility that you might catch the coronavirus again?

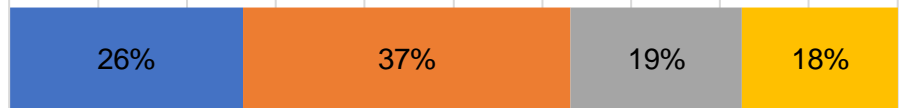

How severe was your case of the coronavirus?

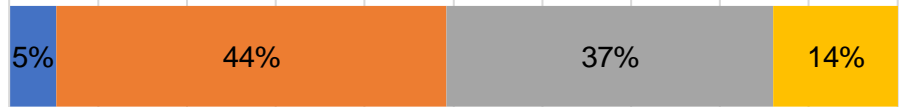

0% 10% 20% 30% 40% 50% 60% 70% 80% 90% 100%

■ Very ■ Somewhat ■ Not so ■ Not at all

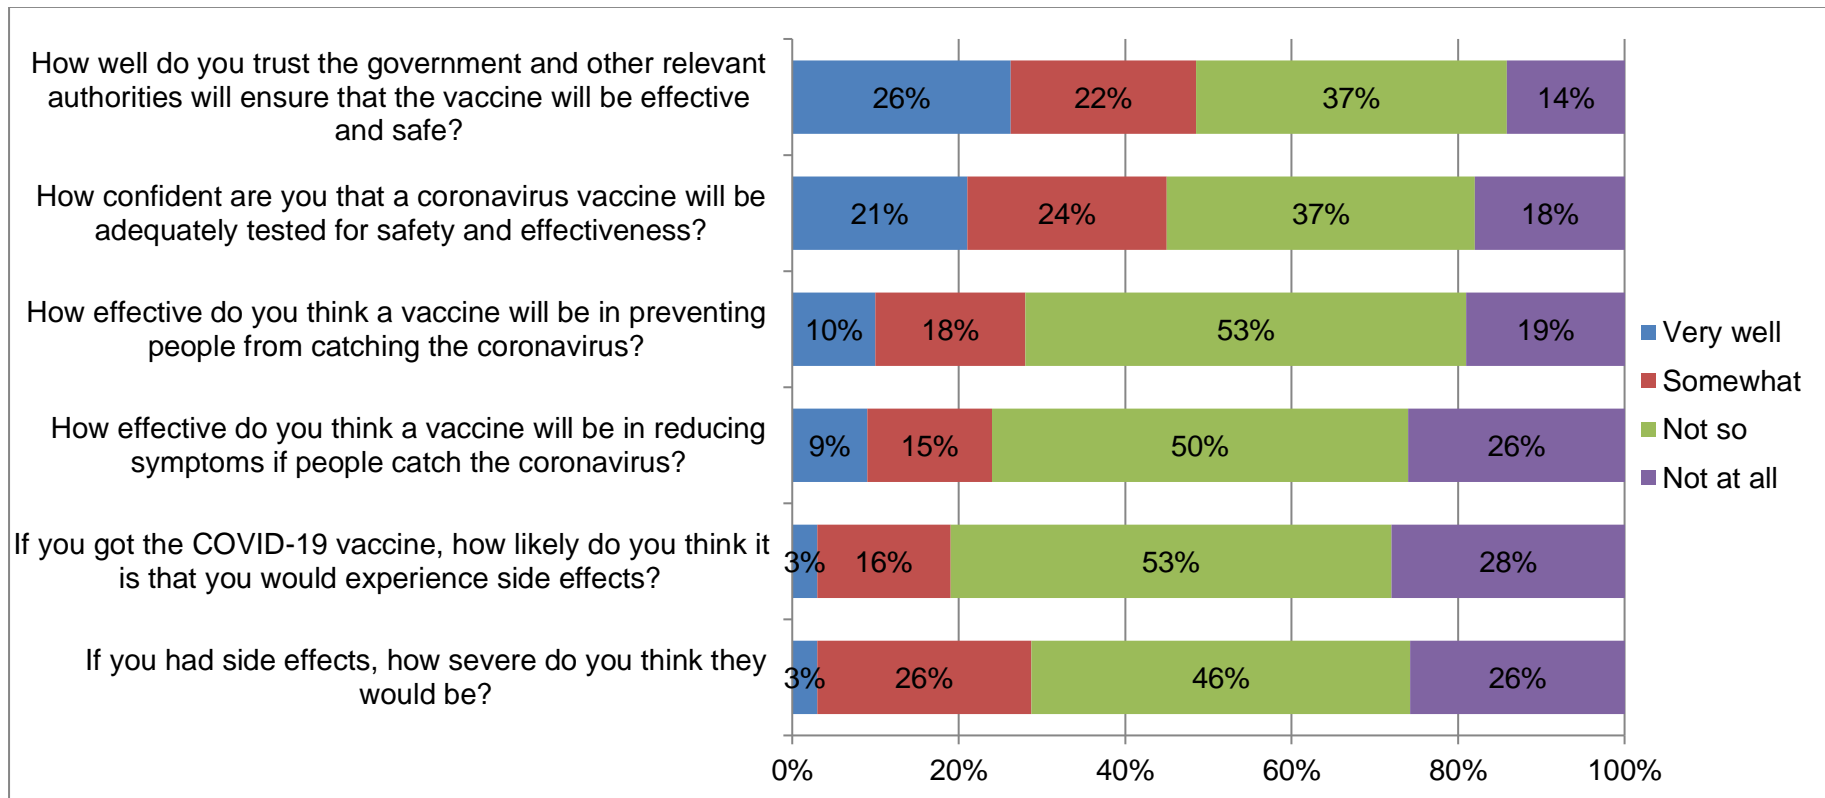

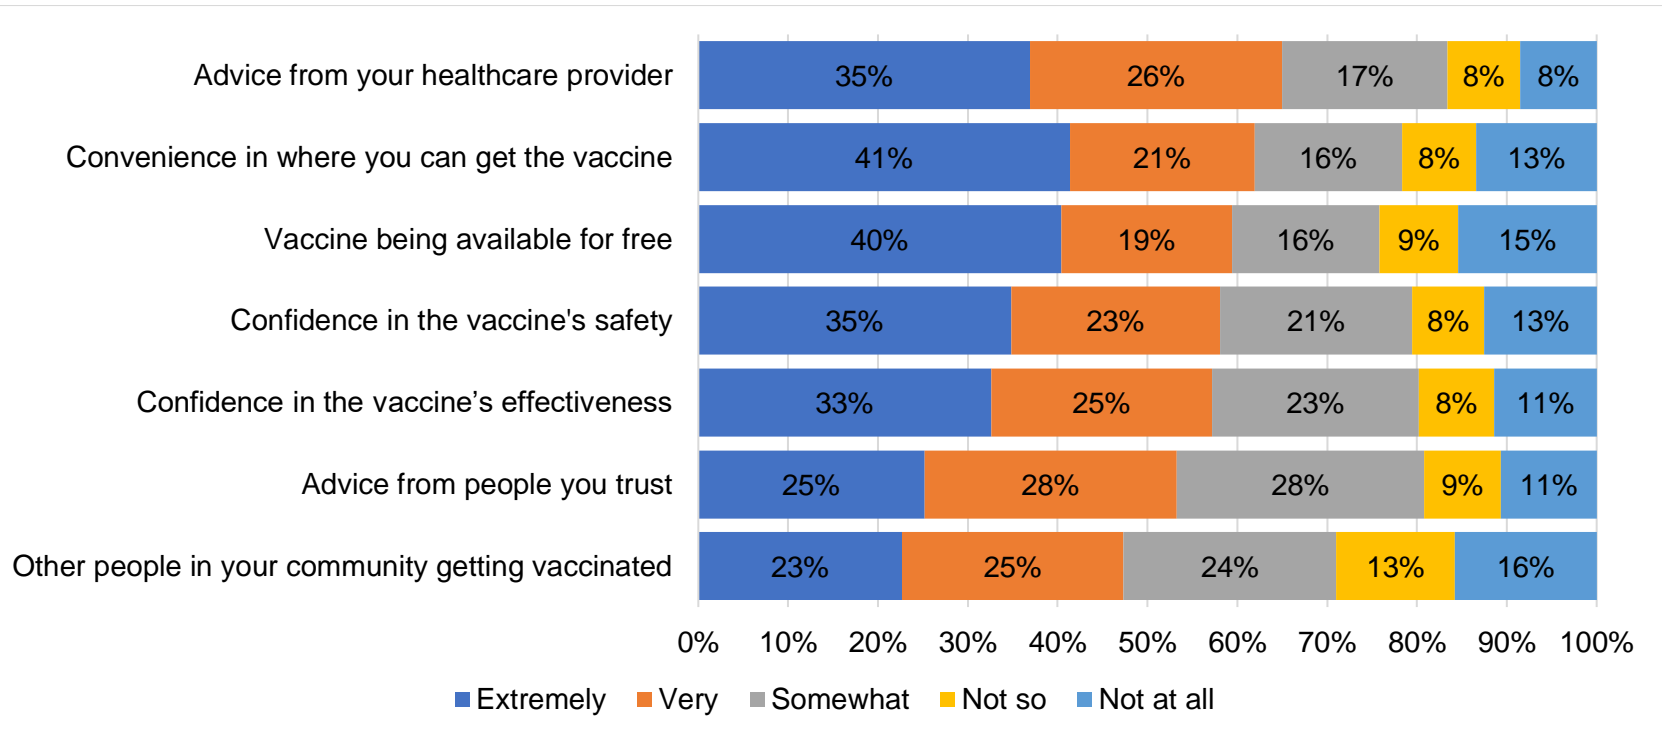

Source: https://medrxiv.org/content/10.1101/2021.06.24.21259505v1.full.pdf
